## Addendum: Resolution of radiation necrosis with bevacizumab following radiation therapy for primary CNS lymphoma

Eugene J. Vaios<sup>1</sup>, Kristen A. Batich<sup>2</sup>, Anne F. Buckley<sup>3</sup>, Anastasie Dunn-Pirio<sup>4</sup>, Mallika P. Patel<sup>5</sup>, John P. Kirkpatrick<sup>1</sup>, Ranjit Goudar<sup>6</sup> and Katherine B. Peters<sup>7,8</sup>

<sup>1</sup>Department of Radiation Oncology, Duke University Medical Center, Durham, NC, USA

<sup>2</sup>Department of Medicine, Division of Medical Oncology, Duke University Medical Center, Durham, NC, USA

<sup>3</sup>Department of Pathology, Duke University Medical Center, Durham, NC, USA

<sup>4</sup>Department of Neurology, UC San Diego Health, San Diego, CA, USA

<sup>5</sup>Department of Pharmacy, Duke University Medical Center, Durham, NC, USA

<sup>6</sup>Virginia Oncology Associates, Norfolk, VA, USA

<sup>7</sup>Department of Neurosurgery, Duke University Medical Center, Durham, NC, USA

<sup>8</sup>Department of Neurology, Duke University Medical Center, Durham, NC, USA

**Published:** October 20, 2022

**Copyright:** © 2022 Vaios et al. This is an open access article distributed under the terms of the [Creative Commons Attribution License](#) (CC BY 3.0), which permits unrestricted use, distribution, and reproduction in any medium, provided the original author and source are credited.

**Consent was added to this article:** Informed consent was obtained from each patient and the study was approved by our institution.

Original article: Oncotarget. 2022; 13:576–582. <https://doi.org/10.18632/oncotarget.28222>
